# Supplementary material for: ATF6α Activation Enhances Survival against Chemotherapy and Serves as a Prognostic Indicator in Osteosarcoma
Source: PubMed Central journal article supplement — Neoplasia. 2019 Apr 25;21(6):516–32. doi: 10.1016/j.neo.2019.02.004 (PMC6484364; doi:10.1016/j.neo.2019.02.004), 2019-04-25
Supplement: mmc1.pdf [file mmc1.pdf]

**Table S1**-List of primers used for qPCR

| <b>Gene Name</b> | <b>Sense Sequence</b> | <b>Antisense sequence</b> |
|------------------|-----------------------|---------------------------|
| 18S rRNA         | CGGCGACGACCCATTCTGAAC | GAATCGAACCCCTGATTCCCCGTC  |
| XBP-1            | CCTTGTAGTTGAGAACCAGG  | GGGGCTTGGTATATATGTGG      |
| ERO1L $\beta$    | ATGCTTTGCTGGTGCTCT    | CTTCATCAGTGGGTACAATCATTTC |
| ATF6 $\alpha$    | TCGAAGGGATCACCTGCTGTT | TCAGGGATGGTGCTGACAAC      |
| PDIA4            | TACAACGGCCCACGAGAAAA  | CTCAGGTTGTTAGCGGCATC      |
| GADD153          | GGAAACAGAGTGGTCATTCCC | CTGCTTGAGCCGTTTCATTCTC    |

**Table S2**-List of antibodies and the dilutions

| Antibody                        | Dilution     |
|---------------------------------|--------------|
| <b>For Immunoblotting</b>       |              |
| ATF6 $\alpha$                   | 1:500        |
| peIF2 $\alpha$                  | 1:1000       |
| eIF2 $\alpha$                   | 1:1000       |
| BiP                             | 1:10,000     |
| GAPDH                           | 1:5000       |
| <b>For Immunohistochemistry</b> |              |
| ATF6 $\alpha$                   | 1:100        |
| BiP                             | 1:200        |
| PDI                             | 1:100        |
| <b>For immunofluorescence</b>   |              |
| ATF6 $\alpha$                   | 1:200        |
| Calreticulin                    | 1:300        |
| Cleaved Caspase-3               | 1:300        |
| GM-130                          | 1:3500       |
| Active Bax                      | 1:100        |
| Alexa Fluor 488                 | 1:800-1:1000 |
| Alexa Fluor 555                 | 1:1000       |

| Cell Lines | Fa (%).<br>cisplatin<br>alone | GSK        |      | STF       |      |
|------------|-------------------------------|------------|------|-----------|------|
|            |                               | Fa (%)     | CI   | Fa (%)    | CI   |
| U2OS       | 1.0±0.0                       | 1±0.0      | >1   | 1.0±0.0   | >1   |
|            | 55.3±0.6                      | 55.3±3.2   | 0.65 | 57.3±4.7  | 0.75 |
|            | 66.7±9.1                      | 66.3±9.5   | 0.91 | 65.0±7.0  | >1   |
|            | 90.7±11.0                     | 90.5±12.1  | 0.83 | 90.3±13.3 | 0.90 |
| 143b       | 1.1±0.14                      | 1±0.0      | >1   | 1±0.0     | >1   |
|            | 18.65±0.49                    | 19.35±3.3  | >1   | 14.6±3.4  | >1   |
|            | 82.7±0.00                     | 81.7±0.4   | 0.76 | 83.8±1.4  | 0.79 |
|            | 86±1.41                       | 87±0.0     | >1   | 86.75±0.5 | >1   |
| hFOB       | 1.5±0.71                      | 1±0.0      | >1   | 3±1.4     | >1   |
|            | 32.2±1.13                     | 26.85±1.5  | 1.00 | 24.55±1.1 | >1   |
|            | 52.95±4.60                    | 40.25±12.5 | >1   | 38.8±10.5 | >1   |
|            | 76.7±0.42                     | 66.6±15.0  | >1   | 65.7±13.7 | >1   |

| Cell Lines | Fa (%).<br>irinotecan<br>alone | GSK        |      | STF       |      |
|------------|--------------------------------|------------|------|-----------|------|
|            |                                | Fa (%)     | CI   | Fa (%)    | CI   |
| U2OS       | 8.5±10.5                       | 9.85±12.5  | >1   | 18.5±24.7 | >1   |
|            | 11±14.2                        | 13.5±17.7  | >1   | 23.7±24.6 | >1   |
|            | 59±9.9                         | 57.7±10.9  | 0.84 | 59.1±40.9 | >1   |
|            | 82.4±3.1                       | 86.2±4.9   | 0.83 | 80.6±22.5 | >1   |
| 143b       | 35.7±15.5                      | 32.95±18.0 | >1   | 38.8±19.7 | 0.99 |
|            | 63.5±20.8                      | 59.75±21.3 | >1   | 63.4±12.5 | 0.89 |
|            | 72.0±11.4                      | 70.1±8.9   | >1   | 70.4±4.8  | >1   |
|            | 87.5±0.4                       | 84.75±1.1  | >1   | 87±49.5   | 0.86 |
| hFOB       | 19.5±4.9                       | 21.1±1.3   | >1   | 21.6±12.4 | >1   |
|            | 36.5±0.8                       | 37.8±2.0   | 0.80 | 43.7±2.5  | 0.54 |
|            | 44.3±2.2                       | 44.745±0.3 | 0.87 | 51.2±4.5  | 0.55 |
|            | 49±1.6                         | 50.6±0.7   | >1   | 56.8±3.2  | 0.40 |

**Tables S3 and S4**-Combination screening for drug synergy in osteosarcoma. Table with select Fa values and CI of different combinations cisplatin or irinotecan with GSK or STF. Synergy calculations were done using the Chou and Talalay combination index (CI), based on the median-effect and mass-action principles.
